# Supplementary material
Source: Springer Nature journal article supplement (https://www.springermedizin.de/resource/supplementary/12891_2009_983_MOESM2_ESM.pdf/9506854)

**a**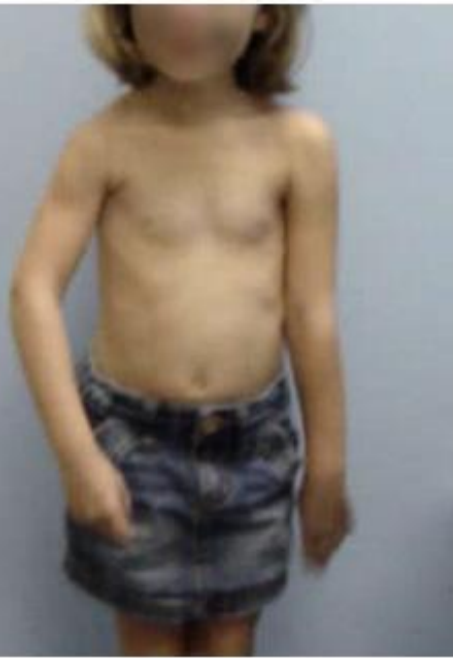**b****Elevated scapula**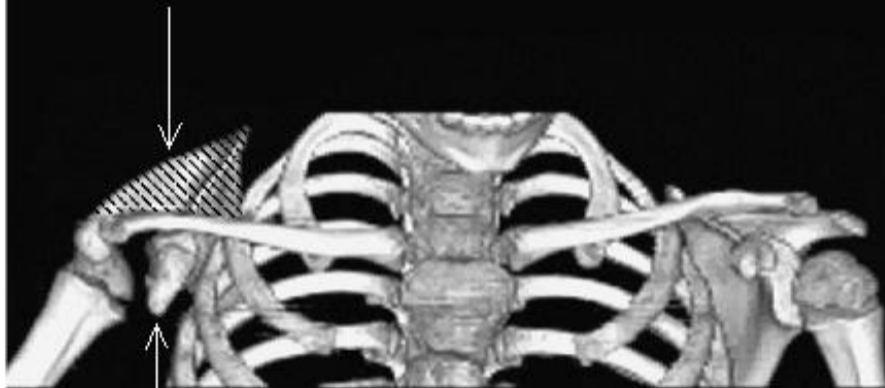**Coracoid process**

Supplement: MOESM2 [file 9506854]
